# Supplementary material
Source: PubMed Central journal article supplement (PMC9262637)
Supplement: NIHMS1809927-supplement-Supplement.pdf [file NIHMS1809927-supplement-Supplement.pdf]

**Supplement Table 1: Relationship between PBL-TL and radiographic changes on HRCT for UCSF SSc-ILD patients**

| Radiologic Feature<br>n=99                | Number |         | Telomere Length (base pair) |         | P-value |
|-------------------------------------------|--------|---------|-----------------------------|---------|---------|
|                                           | with   | without | with                        | without |         |
| Fibrosis                                  | 81     | 18      | 6559                        | 6551    | 0.96    |
| Definite or probable UIP pattern          | 21     | 78      | 6430                        | 6592    | 0.35    |
| Honeycombing                              | 9      | 90      | 6378                        | 6575    | 0.50    |
| Traction bronchiectasis                   | 75     | 24      | 6529                        | 6646    | 0.49    |
| Traction bronchiectasis (moderate-severe) | 45     | 54      | 6473                        | 6627    | 0.26    |
| Ground glass opacities                    | 27     | 72      | 6815                        | 6460    | 0.02    |
| Mosaic perfusion                          | 10     | 89      | 6529                        | 6560    | 0.89    |
| Air-trapping                              | 17     | 82      | 6457                        | 6578    | 0.52    |
| Nodules                                   | 11     | 88      | 6612                        | 6550    | 0.69    |
| Consolidation                             | 9      | 90      | 6719                        | 6541    | 0.31    |
| Airways                                   | 18     | 81      | 6453                        | 6580    | 0.48    |
| Emphysema                                 | 8      | 91      | 6772                        | 6538    | 0.35    |
| Cysts                                     | 11     | 88      | 6679                        | 6542    | 0.50    |
| Subpleural Sparing                        | 49     | 50      | 6630                        | 6486    | 0.29    |
| Reticulation                              | 77     | 22      | 6523                        | 6679    | 0.30    |

PBL, peripheral blood leukocyte; TL, telomere length; HRCT, high-resolution computed tomography; UCSF, University of California San Francisco; SSc-ILD, systemic sclerosis associated interstitial lung disease; UIP, usual interstitial pneumonia.

**Supplement Table 2: Comparison of baseline data in patients with vs. without longitudinal PFTs**

|                                                        | <b>With longitudinal PFT data included in the analysis (n=72)</b> | <b>Without longitudinal PFT data not included in the analysis (n=62)</b> | <b>p-value</b> |
|--------------------------------------------------------|-------------------------------------------------------------------|--------------------------------------------------------------------------|----------------|
| <b>Age, Mean ± SD</b>                                  | 54.5 ± 14.6                                                       | 56.6 ± 10.1                                                              | 0.34           |
| <b>Female, n (%)</b>                                   | 53 (73.6)                                                         | 54 (87.1)                                                                | 0.08           |
| <b>Pulmonary function test</b>                         |                                                                   |                                                                          |                |
| FVC, %Predicted, Mean ± SD                             | 69.5 ± 18.9                                                       | 71.3 ± 20.0                                                              | 0.60           |
| FEV1, %Predicted, Mean ± SD                            | 71.5 ± 19.3                                                       | 71.6 ± 19.1                                                              | 0.98           |
| DLCO, %Predicted, Mean ± SD                            | 49.7 ± 19.1                                                       | 55.6 ± 19.7                                                              | 0.09           |
| <b>High-resolution CT available for scoring, n (%)</b> | 50 (69.4)                                                         | 49 (79.0)                                                                |                |
| Fibrosis                                               | 42 (84)                                                           | 39 (79.6)                                                                | 0.76           |
| Diffuse ground-glass opacities                         | 19 (38)                                                           | 8 (16.3)                                                                 | 0.03           |
| UIP pattern                                            |                                                                   |                                                                          | 0.01           |
| Definite                                               | 2 (4)                                                             | 4 (8.2)                                                                  |                |
| Probable                                               | 3 (6)                                                             | 12 (24.5)                                                                |                |
| Indeterminate                                          | 1 (2)                                                             | 4 (8.2)                                                                  |                |
| Alternative diagnosis                                  | 44 (88)                                                           | 29 (59.2)                                                                |                |
| <b>MUC5B rs35705950 genotype</b>                       |                                                                   |                                                                          | 0.71           |
| GG, n (%)                                              | 60 (83.3)                                                         | 54 (87.1)                                                                |                |
| GT, n (%)                                              | 12 (16.7)                                                         | 8 (12.9)                                                                 |                |
| MAF                                                    | 8.3%                                                              | 6.5%                                                                     |                |
| <b>Telomere length (bp), Mean ± SD</b>                 | 6562 ± 620                                                        | 6546 ± 731                                                               | 0.89           |

PFT, pulmonary function test; FVC, forced vital capacity; FEV1, forced expiratory volume in 1 second; DLCO, diffusing capacity for carbon monoxide; UIP, usual interstitial pneumonia; MAF, minor allele frequency.

**Supplement Table 3: Baseline characteristics of patients with SSc-ILD and longitudinal PFT trends.**

|                                                 | UCSF cohort    | SU cohort      | p-value |
|-------------------------------------------------|----------------|----------------|---------|
|                                                 | SSc-ILD (n=72) | SSc-ILD (n=61) |         |
| <b>Age, Mean ± SD</b>                           | 54.5 ± 14.6    | 55.9 ± 13.8    | 0.57    |
| <b>Female, n (%)</b>                            | 53 (73.6%)     | 52 (85.2%)     | 0.15    |
| <b>BMI, Mean ± SD</b>                           | 25.2 ± 4.3     | 24.4 ± 4.6     | 0.35    |
| <b>Smoking status</b>                           |                |                | 0.73    |
| Never smoker, n (%)                             | 50 (69.4%)     | 38 (62.3%)     |         |
| Current smoker, n (%)                           | 1 (1.4%)       | 1 (1.6%)       |         |
| Former smoker, n (%)                            | 21 (29.2%)     | 22 (36.1%)     |         |
| <b>PFT at baseline</b>                          |                |                |         |
| FVC, %Predicted, Mean ± SD                      | 69.8 ± 17.4    | 79.8 ± 18.3    | 0.002   |
| FEV1, %Predicted, Mean ± SD                     | 71.5 ± 19.3    | 86.1 ± 20.5    | <0.001  |
| DL <sub>CO</sub> , %Predicted, Mean ± SD        | 48.8 ± 18.6    | 65.8 ± 21.2    | <0.001  |
| <b>Anti-topoisomerase I antibody</b>            |                |                | 0.12    |
| Positive, n (%)                                 | 31 (43.1%)     | 17 (27.9%)     |         |
| Negative, n (%)                                 | 39 (54.2%)     | 41 (67.2%)     |         |
| Unknown, n (%)                                  | 2 (2.8%)       | 3 (4.9%)       |         |
| <b>Pulmonary hypertension, n (%)</b>            | 20 (27.8%)     | 19 (31.1%)     | 0.81    |
| <b>High-resolution CT available for scoring</b> | 50 (69.4%)     | 61 (100%)      |         |
| <b>Diffuse ground-glass opacities</b>           | 19 (38.0%)     | 49 (80.3%)     | <0.001  |
| <b>Honeycombing</b>                             | 4 (8.0%)       | 10 (16.4%)     | 0.28    |

SSc-ILD, systemic sclerosis associated interstitial lung disease; PFT, pulmonary function test; UCSF, University of California San Francisco; SU, Stanford University; BMI, body mass index; FVC, forced vital capacity; FEV1, forced expiratory volume in 1 second; DL<sub>CO</sub>, diffusing capacity for carbon monoxide.

**Supplement Figure 1: Distribution of PBL-TL for the entire UCSF cohort (n=213)**

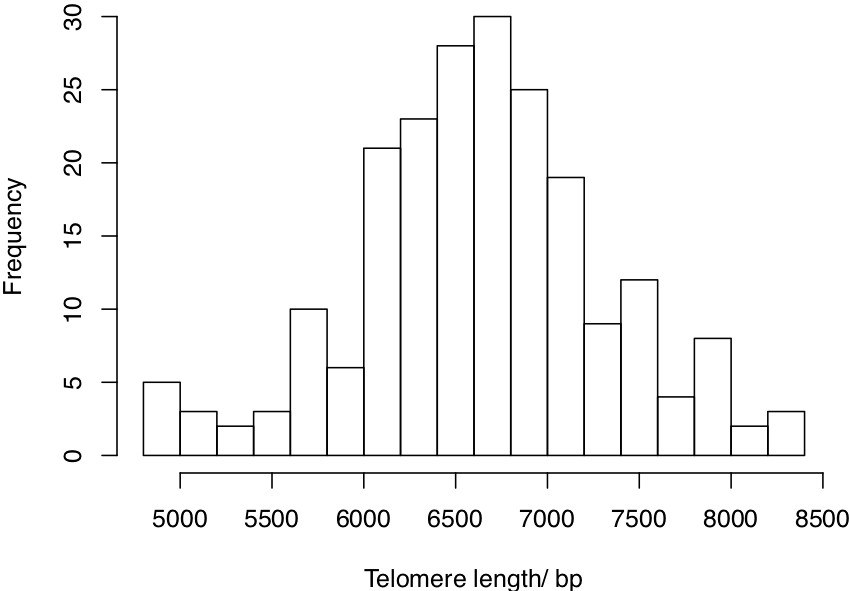

PBL, peripheral blood leukocyte; TL, telomere length; UCSF, University of California San Francisco.

**Supplement Figure 2: UCSF SSc patients with PH had shorter PBL-TL compared to controls (n=79)**

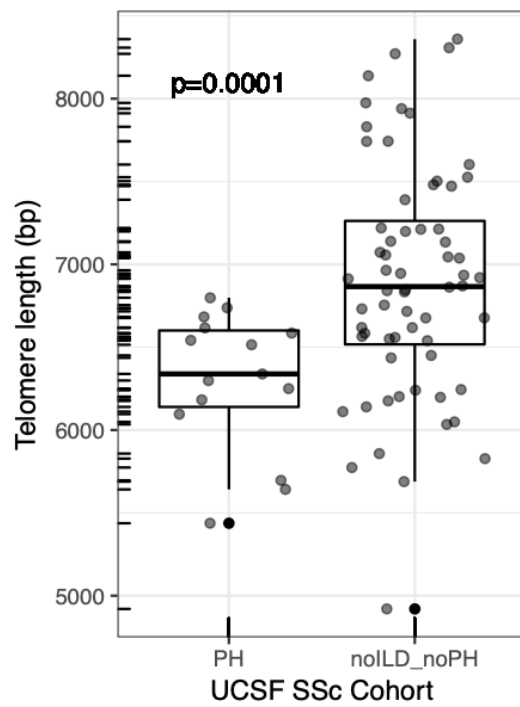

UCSF, University of California San Francisco; SSc, systemic sclerosis; PH, pulmonary hypertension; PBL, peripheral blood leukocyte; TL, telomere length; ILD, interstitial lung disease.

**Supplement Figure 3: UCSF SSc-ILD patients with diffuse GGO on HRCT had longer PBL-TL (n=99)**

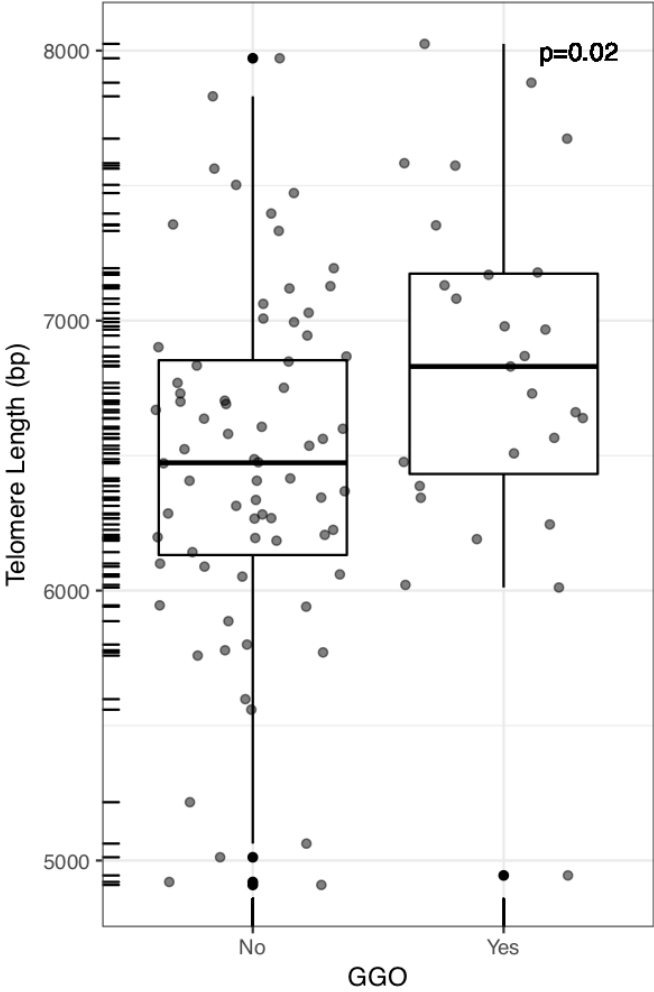

UCSF, University of California San Francisco; SSc-ILD, systemic sclerosis associated interstitial lung disease; GGO: ground-glass opacity; HRCT, high-resolution computed tomography; PBL, peripheral blood leukocyte; TL, telomere length.

**Supplement Figure 4: Boxplot of PBL-TL in SU SSc-ILD patients stratified by one-year change of FVC percent predicted (n=39)**

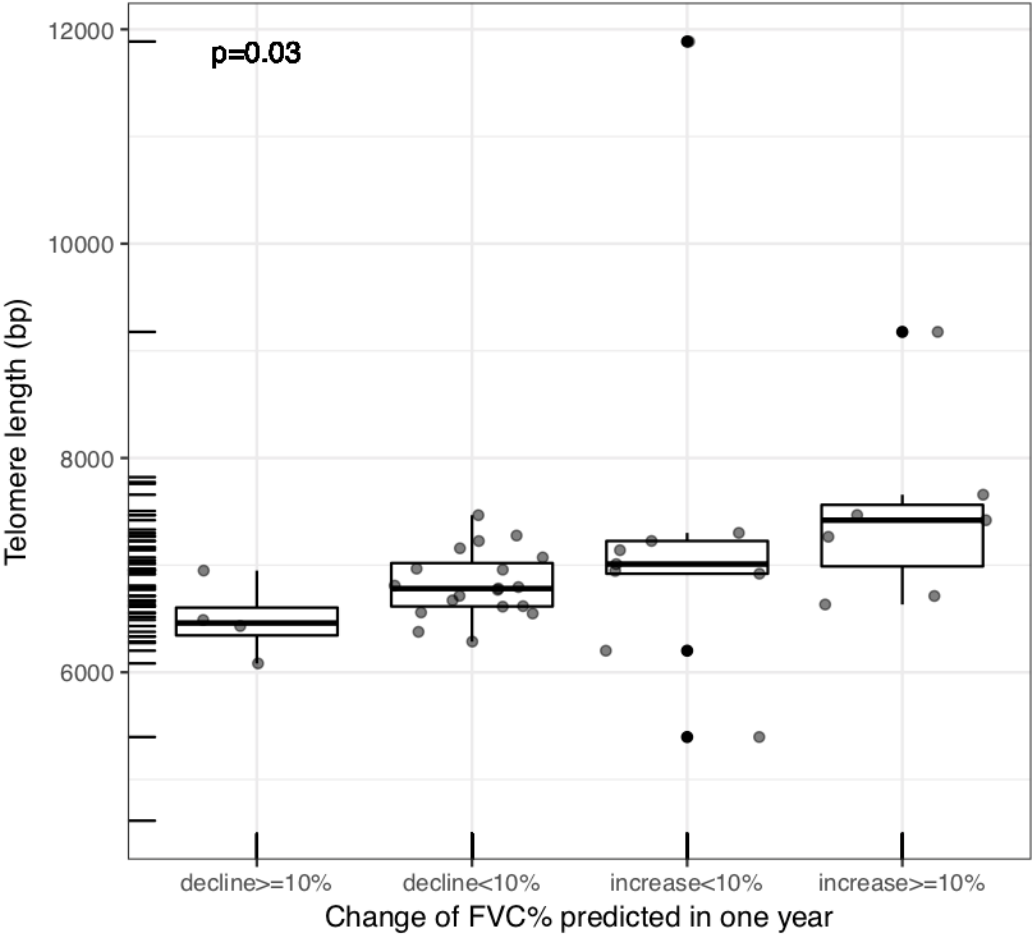

PBL, peripheral blood leukocyte; TL, telomere length; SU, Stanford University; SSc-ILD, systemic sclerosis associated interstitial lung disease; FVC, forced vital capacity.
